# Supplementary material for: Promoting axon regeneration in the central nervous system by increasing PI3-kinase signaling
Source: PubMed Central journal article supplement — Neural Regen Res. 2021 Nov 12;17(6):1172–82. doi: 10.4103/1673-5374.327324 (PMC8643051; doi:10.4103/1673-5374.327324), 2021-11-12
Supplement: NRR-17-1172_Suppl2.pdf [file NRR-17-1172_Suppl2.pdf]

## OPEN PEER REVIEW REPORT 2

**Name of journal:** Neural Regeneration Research

**Manuscript NO:** NRR-D-21-00191

**Title:** Promoting axon regeneration in the central nervous system by increasing PI3-kinase signaling

**Reviewer's Name:** Simone Di Giovanni

**Reviewer's country:** UK

### COMMENTS TO AUTHORS

This is an original and authoritative review on the role of PI3K in axon regeneration after injury with discussion of the implications during development and aging.

I enjoyed reading it

While I understand that the review focuses on neuronal intrinsic mechanisms, injury responses very much rely on cell-cell communication.

I would suggest to add a section discussing the role of PI3K signalling in neuronal-immune-glial communication after injury.

Also, in this context, a useful reference that could be cited is Hervera et al., Nature cell biology, 2018.
